# Demographic effects of aggregation in the presence of a component Allee effect

Daniel C.P. Jorge<sup>1</sup> and Ricardo Martinez-Garcia<sup>2,1\*</sup>

<sup>1</sup>ICTP South American Institute for Fundamental Research & Instituto de Física Teórica, Universidade Estadual Paulista - UNESP, Rua Dr. Bento Teobaldo Ferraz 271, Bloco 2 - Barra Funda, 01140-070 São Paulo, SP, Brazil

<sup>2</sup>Center for Advanced Systems Understanding (CASUS); Helmholtz-Zentrum Dresden Rossendorf (HZDR), Görlitz, Germany.

\*Corresponding author: [r.martinez-garcia@hzdr.de](mailto:r.martinez-garcia@hzdr.de)

## Abstract

Intraspecific interactions are key drivers of population dynamics because they establish relations between individual fitness and population density. The component Allee effect is defined as a positive correlation between any fitness component of a focal organism and population density, and it can lead to positive density dependence in the population per capita growth rate. The spatial population structure is key to determining whether and to which extent a component Allee effect will manifest at the demographic level because it determines how individuals interact with one another. However, existing spatial models to study the Allee effect impose a fixed spatial structure, which limits our understanding of how a component Allee effect and the spatial dynamics jointly determine the existence of demographic Allee effects. To fill this gap, we introduce a spatially-explicit theoretical framework where spatial structure and population dynamics are emergent properties of the individual-level demographic and movement rates. Depending on the intensity of the individual-level processes the population exhibits a variety of spatial patterns, including evenly spaced aggregates of organisms, that determine the demographic-level by-products of an existing individual-level component Allee effect. We find that aggregation increases population abundance and allows populations to survive in harsher environments and at lower global population densities when compared with uniformly distributed organisms. Moreover, aggregation can prevent the component Allee effect from manifesting at the population level or restrict it to the level of each independent group. These results provide a mechanistic understanding of how component Allee effects might operate for different spatial population structures and show at the population level. Because populations subjected to demographic Allee effects exhibit highly nonlinear dynamics, especially at low abundances, our results contribute to better understanding population dynamics in the presence of Allee effects and can potentially inform population management strategies.

## 33 1 Introduction

34 Intraspecific interactions are critical to understanding population ecology because they define how  
35 demographic rates depend on population density and ultimately drive population dynamics. The  
36 Allee effect is characterized by a positive correlation between population size or density and any in-  
37 dividual fitness component (Courchamp et al., 2008; Levitan, 2005; Stephens et al., 1999). Because  
38 of this positive density dependence, populations subjected to Allee effects might have thresholds for  
39 population survival that manifest in sudden extinctions, existence of alternative stable states, and  
40 hysteresis (Courchamp et al., 2008; Lande, 1987; Oro, 2020a; Sun, 2016). These highly nonlinear  
41 features make populations exhibiting Allee effects hard to manage without a mechanistic under-  
42 standing of how the individual-level processes and interactions that underlie the Allee effect are  
43 responsible for the trends and patterns observed in population dynamics.

44 Allee effects are studied mainly at two levels: the component and the demographic Allee effect  
45 (Stephens et al., 1999). The component Allee effect is a positive association between population den-  
46 sity and one (or many) components of individual fitness, such as offspring survival, mating success,  
47 or fecundity (Courchamp et al., 2008; Drake and Kramer, 2011; Orr, 2009) (Fig. 1a). Component  
48 Allee effects rely on several mechanisms. In some fish, rotifer, and mammals such as marmots,  
49 the presence of conspecifics changes the environmental conditions locally, improving habitat quality  
50 and individual fitness (Allee and Bowen, 1932; Allee and Rosenthal, 1949; Ghazoul, 2005; Stephens  
51 et al., 2002). Especially in group-living organisms, cooperative behaviors such as group vigilance,  
52 nursing, resource sharing, and social foraging also make individuals more competent in the presence  
53 of conspecifics (Angulo et al., 2018, 2013; Dechmann et al., 2010; Luque et al., 2013; Nowak and Lee,  
54 2011; Snaith and Chapman, 2008). Allee effects are also frequent in sexually reproducing species.  
55 In motile organisms, females are more likely to find mates at larger population sizes (Dennis, 1989;  
56 Garrett and Bowden, 2002; Liermann and Hilborn, 2001; Tcheslavskaja et al., 2002). In sessile  
57 organisms, such as pollinators or broadcast spawners, fecundation is more likely at high population  
58 densities (Ashman et al., 2004; Guy et al., 2019; Lundquist and Botsford, 2011; Luzuriaga et al.,  
59 2006; Wagenius, 2006). On the other hand, the demographic Allee effect is a population-level emer-  
60 gent property due to the existence of one or more component Allee effects, and it manifests as a  
61 positive correlation between the net per-capita growth rate and the population size. This positive  
62 density-dependence is easier to identify at low population densities because competition hinders its  
63 effect in more crowded scenarios (Courchamp et al., 2008). Demographic Allee effects are strong if  
64 the population cannot survive below a specific threshold size (Allee threshold) or weak if positive  
65 density-dependence is not intense enough to establish such a survival threshold (Courchamp et al.,  
66 2008; Drake and Kramer, 2011).

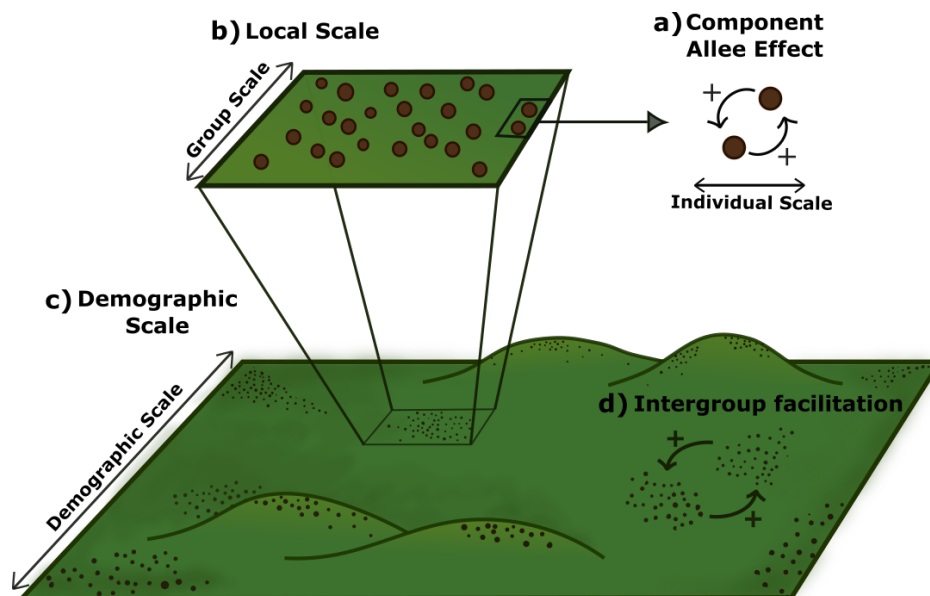

**Figure 1:** Allee effect across spatial scales. The component Allee effect (a) is a result of interactions between individuals that manifests at a (b) local scale around a focal organism. At the demographic scale (c), individuals are spatially scattered, possibly forming aggregates. In the presence of aggregates, the population has a fourth characteristic scale, defining inter-group facilitation (d)

67 The fitness of a focal individual in the presence of a component Allee effect is a nonlinear func-  
68 tion of the local density of conspecifics around it (Fig. 1b). Moreover, because Allee effects have  
69 a more substantial impact at low population densities and often require the direct interaction be-  
70 tween at least two organisms, the spatial population structure is key to determining whether and  
71 to which extent a component Allee effect will manifest at the demographic level (Kanarek et al.,  
72 2013; Kramer et al., 2009; Surendran et al., 2020) (Fig. 1c). Back to Allee’s seminal experiments,  
73 several studies have investigated the impact of the spatial population structure, and more specifi-  
74 cally of aggregation, on Allee effects (Allee, 1938). For instance, some plant populations produce  
75 more and heavier seeds if distributed in clumps (Luzuriaga et al., 2006; Wagenius, 2006). Plant  
76 aggregates can also facilitate nearby individuals because they attract pollinators to them, which  
77 extends the facilitation range beyond the scale of a single cluster of plants (Fig. 1d) (Le Cadre  
78 et al., 2008), and ameliorate physical stresses (Silliman et al., 2015). Broadcast spawners subjected  
79 to a strong Allee effect, such as the red sea urchin *Strongylocentrotus franciscanus*, can survive at  
80 low abundances by aggregating (Guy et al., 2019; Lundquist and Botsford, 2011). Finally, several  
81 social species form spatially segregated groups, which could contribute to population persistence  
82 in harsh environmental conditions (Angulo et al., 2018; Lerch et al., 2018; Woodroffe et al., 2020).  
83 Aggregation and group living are thus ubiquitous features of populations subjected to Allee effects,  
84 and they strongly influence the emergent population dynamics. To explain how these spatial fea-

85 tures impact populations subjected to component Allee effects, recent studies have introduced the  
86 group-level Allee effect, defined as any positive association between the organism's fitness and group  
87 size (Lerch et al., 2018). However, a theoretical framework describing how group-level Allee effects  
88 emerge from component Allee effects and the individual-level processes responsible for aggregation  
89 and group formation is lacking.

90 Over the last decades, theoretical studies have been key to develop much of our current un-  
91 derstanding of Allee effects (Asmussen, 1979; Cushing, 1988; Hsu and Fredrickson, 1975; Kostitzin,  
92 1940; Lande, 1987; Sun, 2016; Tammes et al., 1964; Volterra, 1938). Several models, either de-  
93 terministic or stochastic, consider well-mixed populations and disregard spatial degrees of freedom  
94 (Dennis, 1981, 2002; Méndez et al., 2019). The effect of space has been investigated mainly using  
95 metapopulation approaches in which each node represents a group or cluster of individuals and links  
96 represent any inter-group interaction (Padrón and Trevisan, 2000; Rijnsdorp and Vingerhoed, 2001).  
97 These frameworks already incorporate group-level Allee effects because they restrict fitness benefits  
98 due to intraspecific interactions to each metapopulation and have helped explain why component  
99 Allee effects rarely many manifest at the demographic level in group-living species (Courchamp  
100 et al., 2008; Rijnsdorp and Vingerhoed, 2001). However, metapopulation models impose the exis-  
101 tence of groups in the stationary state and do not describe the group-forming dynamics. Alternative  
102 approaches, based on individual-based models (IBMs) or partial differential equations (PDEs), in-  
103 corporate space explicitly and can describe the group-forming dynamics (Keitt et al., 2001; Maciel  
104 and Lutscher, 2015; Surendran et al., 2020; Wang et al., 2019). Therefore, these approaches can  
105 explain how different spatial patterns of population density impact the outcome of ecological dy-  
106 namics, such as species invasions, in the presence of Allee effects (Keitt et al., 2001; Maciel and  
107 Lutscher, 2015) or Allee-effect features, such as the Allee threshold (Surendran et al., 2020).

108 In this work, we develop a theoretical framework to investigate Allee effects across different levels  
109 of spatial organization within a population. We present this formalism starting from a stochastic  
110 and spatially explicit individual-based description of a population with density-dependent reproduc-  
111 tion mimicking a component Allee effect. This description is the most fundamental level at which  
112 we can describe a population, allowing us to explicitly model the relationship between the mech-  
113 anism responsible for the component Allee effect and individual birth and death rates. From this  
114 individual-level description, we derive the corresponding deterministic equation for the dynamics  
115 of the population density. This approximation allows us to investigate in which conditions individ-  
116 uals aggregate due to individual-level interactions and to study the population-level consequences  
117 of the component Allee effect depending on the spatial population structure. Finally, we identify  
118 the cases in which we can describe the long-term spatial distribution of individuals in terms of  
119 a metapopulation model, and use this approach to investigate the emergence of group-level Allee

120 effects. Our results recapitulate several observations on the interplay between spatial structure,  
121 group, and demographic Allee effects, providing a unifying theoretical framework to investigate the  
122 interplay between component Allee effects and spatial dynamics.

## 123 2 Methods

### 124 2.1 A spatially explicit individual-based model with component Allee effect

125 At the most fundamental level, we describe the spatio-temporal population dynamics using an  
126 IBM in which we can incorporate any ecological interaction, such as competition, predation, or  
127 cooperation, movement, and birth-death dynamics tracking single individuals. We consider a popu-  
128 lation with density-independent birth, death, and movement and also account for density-dependent  
129 birth and death processes. Specifically, individuals interact via binary reproductive facilitation and  
130 ternary competition. Reproductive facilitation is common even in species with asexual reproduction  
131 when individuals need the presence of conspecifics to reach the physiological condition to reproduce  
132 (Courchamp et al., 2008). Some examples of species exhibiting asexual reproduction and repro-  
133 ductive facilitation are self-fertile snails, and parthenogenetic female lizards (Crews et al., 1986;  
134 Thomas and Benjamin, 1974). Competition, on the other hand, reduces individual fitness at very  
135 high population densities and is necessary to avoid unbounded population growth. The combination  
136 of binary reproductive facilitation and ternary competition results in a hump-shaped relationship  
137 between per capita reproduction rate and local density of individuals similar to that reported by  
138 Allee in his experiments with laboratory populations of the flour beetle (Allee, 1938; Allee et al.,  
139 1949).

140 We can summarize the previous processes and interactions in the following set of demographic  
141 reactions

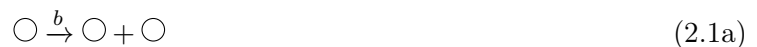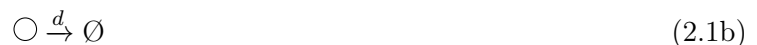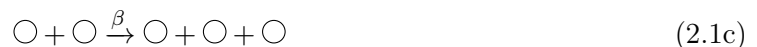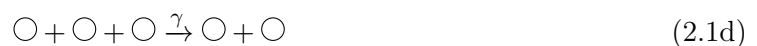

142 (2.1a) and (2.1b) represent density-independent birth and death. (2.1c) represents a binary cooper-  
143 ative interaction in which two individuals interact at rate  $\beta$  and produce a third individual. The last  
144 reaction, (2.1d), describes ternary competition. This set of processes is one of the mathematically  
145 simplest ways of modeling a component Allee effect at the individual level (Méndez et al., 2019).

146 However, one can think of many other density-dependent processes that might result in a compo-  
 147 nent Allee effect, such as reduced death, sexual reproduction, or collective predation, among others  
 148 (Drake and Kramer, 2011; Oro, 2020b). Any of these alternative processes can be incorporated into  
 149 our modeling approach by simply modifying the set of reactions (2.1).

150 To introduce spatial dynamics, we consider that individuals are located in the sites of a one-  
 151 dimensional regular lattice with periodic boundary conditions, but it is straightforward to extrap-  
 152 olate the derivation to more realistic two-dimensional landscapes. We label each lattice node with  
 153 an integer index  $i \in [0, N]$ , and denote the spatial coordinate with  $x \in [0, L]$ . The distance between  
 154 two adjacent lattice nodes is  $\delta x$  such that the spatial coordinate of the  $i$ -th node is  $x_i = i \delta x$ . Indi-  
 155 viduals move on the lattice performing a nearest-neighbor random walk, and the density-dependent  
 156 interactions in (2.1c)-(2.1d) only occur if individuals are within an interaction-specific range.

157 We can express individual random movement using the reaction notation of (2.1) as

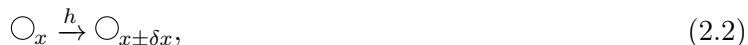

158 where  $h$  is the jump transition rate and  $\delta x$  is the displacement length. These choices result in  
 159 a diffusive movement with diffusion coefficient  $D = h \delta x^2$ . To account for the spatial extent of  
 160 the interactions between individuals, we modify the demographic rates in the reactions (2.1c) and  
 161 (2.1d). We consider that two individuals facilitate one another if they are closer than the facilitation  
 162 range  $R_f$ . As a result, a focal individual at location  $x$  reproduces with rate  $\beta/2R_f$ . In terms of  
 163 reactions, this process can be written as:

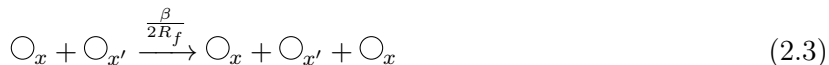

164 provided that  $|x - x'| \leq R_f$ . For negative interactions, we consider that a focal individual at location  
 165  $x$  can die due to competition by forming triplets with two neighbors at locations  $x'$  and  $x''$ . This  
 166 process occurs with rate  $\gamma/4R_c^2$  provided that the distance between the focal individual and each of  
 167 these two neighbors is shorter than or equal to the competition range  $|x - x'| \leq R_c$  and  $|x - x''| \leq R_c$ .  
 168 In terms of reactions, we can write this process as

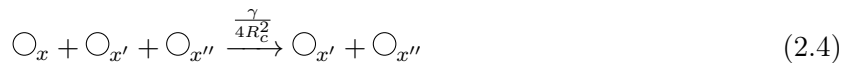

169 Finally, notice that both for the facilitation and the competition terms, we are assuming that the  
 170 non-local reaction rates do not depend on the distance between individuals as long as the pairwise  
 171 distances between individuals in a pair or triplet are shorter than the interaction range. We are  
 172 therefore modeling the interaction kernel with a top-hat function. The factors dividing the rates  $\beta$

173 and  $\gamma$  are normalizing factors of the top-hat kernel. This normalization makes birth/death rates  
174 depend on population density rather than on population size.

## 175 2.2 Derivation of population-level approximations

176 We use the Doi-Peliti formalism to derive a deterministic approximation of the spatial stochastic  
177 dynamics introduced in Section 2.1. This deterministic approximation neglects demographic fluc-  
178 tuations and maps the set of discrete reactions to a deterministic partial differential equation that  
179 describes the dynamics of a population density field  $\rho(x, t)$  in continuous space and time (Doi,  
180 1976; Hernández-García and López, 2004; Peliti, 1985; Täuber, 2007). Hence, this approximation  
181 fails to describe noise-driven consequences of the Allee effect that might be ecologically relevant at  
182 low population sizes, such as extinctions caused by demographic noise (Méndez et al., 2019). It,  
183 however, allows us to apply tools from spatially-extended dynamical systems and obtain analyti-  
184 cal insights of the underlying stochastic dynamics. More specifically, we can investigate in which  
185 conditions individuals form aggregates, resulting in a regular spatial pattern of population density  
186 (Cross and Hohenberg, 1993). Following the steps detailed in the Supplementary Material section  
187 S1, the stochastic dynamics defined in Section 2.1 leads to the following partial differential equation  
188 for  $\rho(x, t)$

$$\frac{\partial \rho(x, t)}{\partial t} = [r + \beta \tilde{\rho}_f(x, t) - \gamma \tilde{\rho}_c^2(x, t)] \rho(x, t) + D \nabla_x^2 \rho(x, t), \quad (2.5)$$

189 where

$$\tilde{\rho}_\alpha(x, t) = \int G(|x - x'|, R_\alpha) \rho(x', t) dx' \quad (2.6)$$

190 with  $\alpha = \{f, c\}$  for facilitation and competition, respectively.  $G(|x - x'|; R_\alpha)$  is the normalized  
191 interaction kernel for each of the intraspecific interactions

$$G(|x - x'|; R_\alpha) = \begin{cases} \frac{1}{2R_\alpha} & \text{if } |x - x'| \leq R_\alpha \\ 0 & \text{otherwise.} \end{cases} \quad (2.7)$$

192 When the population density is uniform, the nonlocal model of Eq. (2.5) is mathematically  
193 equivalent to the cubic model used in the literature as the paradigmatic example of a population-  
194 level model with demographic Allee effect (Kot, 2001; Méndez et al., 2019; Oro, 2020a). This cubic  
195 model has two stable stationary solutions and one unstable. One of the stable stationary solutions  
196 is the extinction state. The second stable stationary state,  $\rho_+$ , and the unstable one,  $\rho_-$ , are the

197 roots of the quadratic equation  $r + \beta \rho - \gamma \rho^2 = 0$ ,

$$\rho_{\pm} = \frac{\beta \pm \sqrt{\beta^2 + 4\gamma r}}{2\gamma}. \quad (2.8)$$

198 Finally, because  $\rho(x, t)$  is a population density, we must integrate it over the system size to  
199 obtain the total population size,

$$A = \int_0^L \rho(x, t) dx. \quad (2.9)$$

## 200 3 Results

### 201 3.1 Group formation

202 We first perform numerical simulations of the stochastic dynamics represented by the set of reactions  
203 in (2.1)-(2.4) using the Gillespie algorithm (Gillespie, 1977). For high diffusion, i.e. high values of  
204  $h$ , the population reaches a steady state with a uniform spatial distribution of organisms (Fig. 2a,  
205 b). As diffusion decreases, however, individuals start to aggregate and the population develops a  
206 spatial pattern characterized by isolated clumps of organisms interspersed with unpopulated regions  
207 (Fig. 2c-f). Moreover, the total population size increases in the stationary state due to aggregation  
208 (Fig. 2g), indicating that grouping improves the environmental conditions and increases the system  
209 carrying capacity. The same type of spatial structure and population dynamics are observed in two  
210 dimensions (Fig. S1).

211 Next, we compare these simulation outcomes with the results of integrating the deterministic  
212 approximation in Eq. (2.5). Our results return a very good quantitative agreement between the  
213 stochastic individual-level dynamics and the deterministic equation for population density (Fig. 3),  
214 which allows us to use the latter to investigate in which conditions aggregates form and their  
215 population-level consequences.

216 To investigate whether organisms aggregate or not, we perform a linear stability analysis of  
217 Eq. (2.5). This technique consists in adding a small spatial perturbation to a stable uniform solution  
218 of the equation and calculating the perturbation growth rate. If the perturbation growth rate is  
219 negative, the uniform solution is stable and patterns do not form. Conversely, the perturbation  
220 leads to spatially periodic solutions or patterns if its growth rate is positive (Cross and Hohenberg,  
221 1993). We consider a solution of the form  $\rho(x, t) = \rho_+ + \epsilon \psi(x, t)$  where  $\rho_+$  is a uniform solution  
222 of Eq. (2.5), and  $\psi(x, t)$  an arbitrary perturbation modulated by an amplitude parameter  $\epsilon \ll 1$ .  
223 We insert this solution into Eq. (2.5) and obtain an ordinary differential equation for the dynamics  
224 of the perturbation  $\psi(x, t)$ . By linearizing and Fourier transforming this differential equation, we  
225 obtain the perturbation growth rate as a function of its wavenumber  $k$  (see Supplementary Material



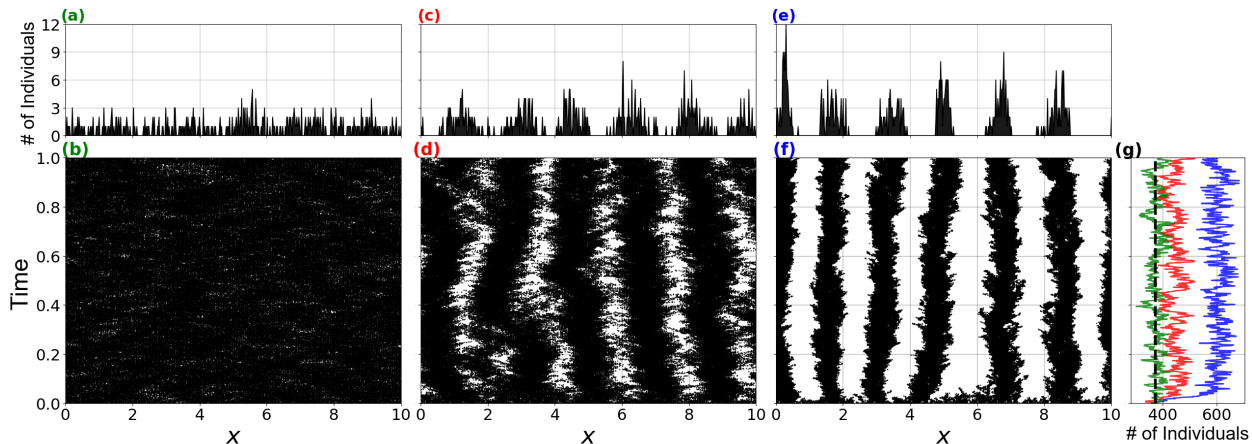

**Figure 2:** Emergence of spatial patterns for different diffusion regimes. Spatial distribution of individuals resulting from the individual-based stochastic model for (a-b,  $D = 0.08$ ), intermediate (c-d,  $D = 1.2$ ), and high diffusion (e-f,  $D = 8$ ). Top panels (a, c, e) show the number of individuals at each lattice node at the end of a single simulation run. Bottom panels (b, d, f) show the temporal dynamics of the spatial distribution of individuals. The leftmost panel (g) shows the dynamics of population size at high (green), intermediate (red), and low (blue) diffusion together with the prediction from the non-spatial model (black-dashed line),  $A = \rho_+ L$ . Bottom panels (b, d, f, g) share the same time scale in the vertical axis and top panels share the same  $x$  axis as their bottom counterparts. Other parameter values for all panels:  $b = 30$ ,  $d = 40$ ,  $\beta = 4$ ,  $\gamma = 0.1$ ,  $L = 10$ ,  $R_f = 0.75$  and  $R_c = 1$ ,  $\delta x = 0.02$ ; uniform initial condition. See Supplementary Material section S6 for details on the algorithm.

226 section S2 for details of the calculation). This perturbation growth rate is

$$\lambda(k) = \rho_+ \left[ \beta \frac{\sin(R_f k)}{R_f k} - 2\gamma\rho_+ \frac{\sin(R_c k)}{R_c k} \right] - Dk^2. \quad (3.1)$$

227 If  $\lambda(k)$  is positive for a given wavenumber  $k$ , a perturbation with that wavenumber will grow and  
 228 create a regular pattern of population density. The wavenumber maximizing  $\lambda(k)$  in Eq. (3.1),  $k_{max}$ ,  
 229 defines the dominant periodicity of the spatial pattern at short times and is related to the periodicity  
 230 of the long-term spatial pattern of population density. Hence, we can estimate the number of groups  
 231  $m$  that form in a system of size  $L$  as  $m \approx L k_{max}/2\pi$ . Moreover, we can better understand how  
 232 the different processes and interactions included in the microscopic model contribute to pattern  
 233 formation by analyzing term by term all the different contributions to the perturbation growth  
 234 rate.

235 First, the linear stability analysis shows that diffusion contributes with a negative term to  
 236 Eq. (3.1) and hence tends to homogenize population density and eliminate patterns. Second, long-  
 237 range competition and facilitation enter in the perturbation growth rate via the Fourier transform  
 238 of their corresponding interaction kernel, which, in the case of the top-hat kernel chosen in our  
 239 model, are damped oscillatory functions with interaction-specific frequency, magnitude, and sign

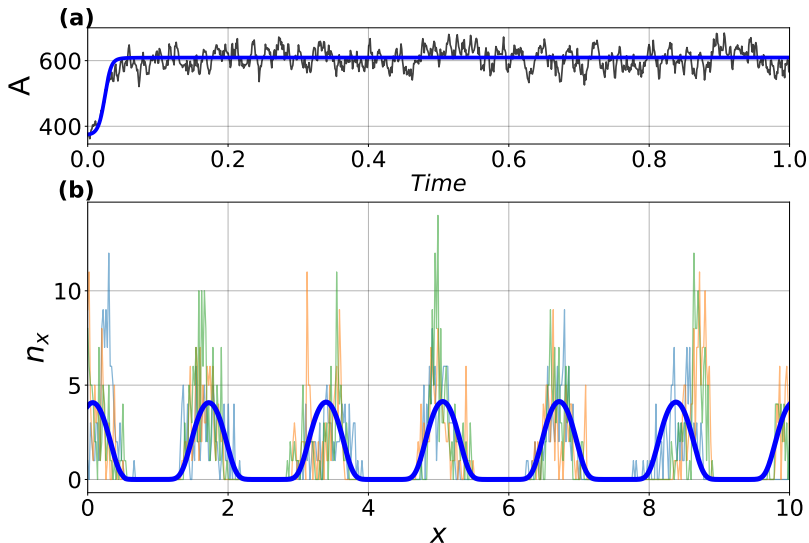

**Figure 3:** Comparison between the stochastic model and its deterministic limit. A) Population size as a function of time for a single realization of the stochastic process (black line) and the deterministic approximation (blue). B) Spatial distribution of individuals generated by the stochastic dynamics (thin blue, orange, and green lines; each line represents a snapshot of the stationary spatial distribution of individuals) and the deterministic approximation (blue thick curve). For the latter, we used an initial condition  $\rho_+ + \phi(x)$ , where  $\phi(x)$  is a white noise uncorrelated in space with mean zero and variance  $\epsilon \ll 1$ , and transformed population density to size by multiplying the value of the density field in each of the PDE integration nodes by the length of the lattice mesh used in the discrete simulations  $\delta x$ . Parameters and lattice mesh are the same we used in Figure 2 (e, f). The deterministic simulations run until  $t = 1500$ , with  $dt = 0.05$  and  $dx = 0.008$ . See Supplementary Material section S6 for details on the algorithm.

240 (Fig. 4). The frequency of each oscillatory function is determined by the interaction range, while  
 241 the magnitude is determined by the intensity of the intraspecific interaction. The sign preceding  
 242 the each oscillatory function indicates how competition or facilitation impact population growth,  
 243 with the negative sign corresponding to competition and the positive one to facilitation.

244 To better understand the role of long-range competition and facilitation in the formation of  
 245 aggregates, we next consider the limit cases in which each of these interactions vanishes or acts on a  
 246 local scale. In the local competition limit,  $R_c \rightarrow 0$ , the perturbation growth rate is always negative  
 247 because  $\rho_+ < \beta/(2\gamma)$  when populations are uniformly distributed [see Eq. (2.8)]. Therefore, patterns  
 248 do not form. However, if facilitation is local,  $R_f \rightarrow 0$ , or vanishes,  $\beta = 0$ , the perturbation growth  
 249 rate can still be positive for certain wavenumbers, and patterns can potentially form. Varying  
 250 facilitation makes the fastest-growing wavenumber, and therefore the number of groups, oscillate  
 251 around the value obtained when long-range interactions are purely competitive. Therefore, long-  
 252 range competition is a sufficient and necessary condition for pattern formation, and it sets the  
 253 periodicity of the long-term spatial pattern of population density. Facilitation, on the other hand,  
 254 plays a secondary role in pattern formation, rearranging the pattern periodicity around the value

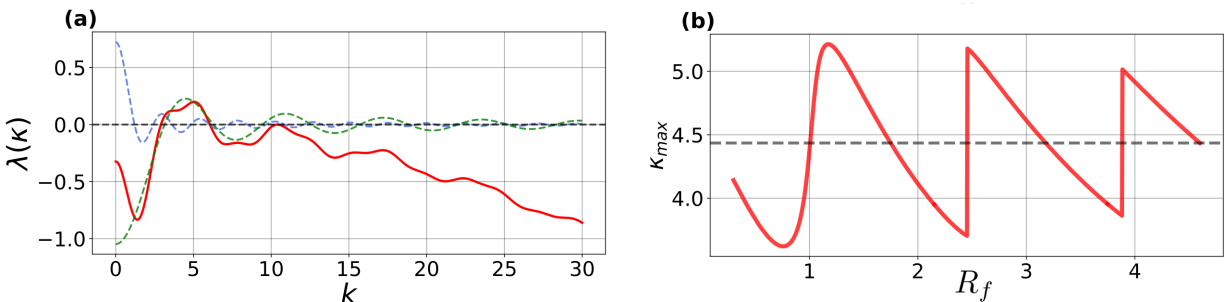

**Figure 4:** a) Perturbation growth rate as a function of the wavenumber  $k$  (red). The dashed lines represent the contributions of the facilitation (blue) and competition (green) terms to  $\lambda(k)$ . b) The fastest growing wavenumber,  $k_{max}$ , as a function of  $R_f$ . The grey dashed line is the number of peaks predicted in the absence of facilitation,  $\beta \rightarrow 0$ . We use  $r = -2$ ,  $D = 0.001$  and  $\beta = 1$ ,  $\gamma = 1$ . For panel (a) we choose  $R_f = 2.6$ .

255 set by the competition range (Rietkerk and Van de Koppel, 2008). Previous studies have already  
 256 identified long-range competition as a cause of spatial patterns through the establishment of the  
 257 so-called exclusion regions, i.e., regions between clusters of organisms in which individuals would  
 258 compete with individuals from two neighbor groups (Hernández-García and López, 2004; Martínez-  
 259 García et al., 2013, 2014). In fact, for low diffusion, our simulations show that the distance between  
 260 aggregates is very close to the competition range  $R_c$ , as expected when patterns form due to exclusion  
 261 regions (Hernández-García and López, 2004; Martinez-Garcia et al., 2023; Pigolotti et al., 2007).  
 262 Moreover, the spatial patterns of population density exhibit aggregates shorter than the range of  
 263 both non-local interactions, which makes the intensity of competition and facilitation inside an  
 264 aggregate approximately constant.

### 265 3.2 The effect of the population spatial distribution on demographic Allee effect

266 In the previous section, we investigated the conditions in which organisms distribute in non-uniform  
 267 patterns of population density and quantified the features of the emergent aggregates. Next, we  
 268 study how aggregation impacts the demographic Allee effect compared to a uniformly distributed  
 269 population. More specifically, we focus on how group formation affects the main features of a strong  
 270 demographic Allee effect: the stationary population density, the Allee threshold, and the value of  
 271 the net growth rate at which extinction is the only stationary state,  $r_c$ . Because we are interested in  
 272 the strong Allee effect regime, we limit our analysis to negative density-independent net population  
 273 growth rates,  $r < 0$ . In this parameter regime, if the population density is uniform, from Eq. (2.8),  
 274 we find that  $r_c = -\beta^2/(4\gamma)$  and both  $\rho_+$  and  $\rho_-$  exist and are positive for  $r \in [r_c, 0]$ . This range  
 275 of values of  $r$  defines the region of the parameter space in which the population exhibits a strong  
 276 demographic Allee effect, with Allee threshold equal to  $\rho_-$  and stationary population density  $\rho_+$ .

277 As we already saw from the simulations of the stochastic individual-based dynamics, aggregation  
278 increases the stationary population density. The Allee threshold becomes space-dependent, and it  
279 is determined by the local density of individuals within the competition and facilitation ranges.  
280 This local densities, in turn, depend on the number and spatial arrangement of groups. Finally,  $r_c$   
281 decreases due to aggregation (Fig. 5). As a result of these changes in  $r_c$  and the Allee threshold,  
282 populations exhibiting a self-organized spatial pattern of population density and a component Allee  
283 effect can persist in harsher environments and at higher numbers than uniformly distributed popula-  
284 tions. Moreover, because spatially structured populations have lower Allee thresholds, they are less  
285 susceptible to extinctions caused by environmental perturbations and can recover after extinction  
286 following smaller fluctuations than uniformly distributed populations. We obtained these results  
287 using the deterministic approximation in Eq. (2.5), which allows us to compute both stable and  
288 unstable solutions of our model (see Supplementary Material section S3 for a detailed description  
289 of how we obtained the bifurcation diagram in Fig. 5). We further tested these predictions with  
290 direct numerical simulations of the individual-level stochastic dynamics and obtained a very good  
291 agreement for most values of  $r$ . The disagreement between the deterministic approximation and  
292 stochastic simulations appears for values of  $r$  close to  $r_c$ . In this regime, fluctuations in population  
293 size can take the population size below the Allee threshold and cause extinctions more easily (Den-  
294 nis, 2002). Thus, fluctuations become an important driver of population dynamics in this parameter  
295 regime, and the mean-field results diverge from the stochastic ones.

296 To develop a more mechanistic understanding of how spatial patterns impact the properties of  
297 the demographic Allee effect, we further approximate the deterministic equation (2.5) for population  
298 density by a network, metapopulation-like description in which each node or population represents  
299 a group of individuals and each link represents the existence of inter-group facilitation. We build  
300 this approximation based on three features of the spatial patterns of population density. First,  
301 all individuals within a group must interact with one another via competition and facilitation.  
302 Mathematically, this means that competition and facilitation ranges must be greater than clusters  
303 of organisms. Second, individuals of different groups must not compete with each other. In terms  
304 of our model, this condition implies that the competition range must be shorter than the distance  
305 between pattern aggregates. Finally, if two groups interact with each other via facilitation, this  
306 positive interaction must reach all the individuals in both groups. Therefore, the facilitation range  
307 must be large enough to encompass all the individuals of a neighbor group. The first two assumptions  
308 are only met when diffusion is low, and the spatial structure of the system is determined mainly by  
309 the finite-range ecological interactions. The last assumption is correct provided that the first two  
310 are met, except for specific values of  $R_f$  for which the facilitation range reaches neighboring clusters  
311 partially. Considering these three assumptions, the number of individuals in each group changes

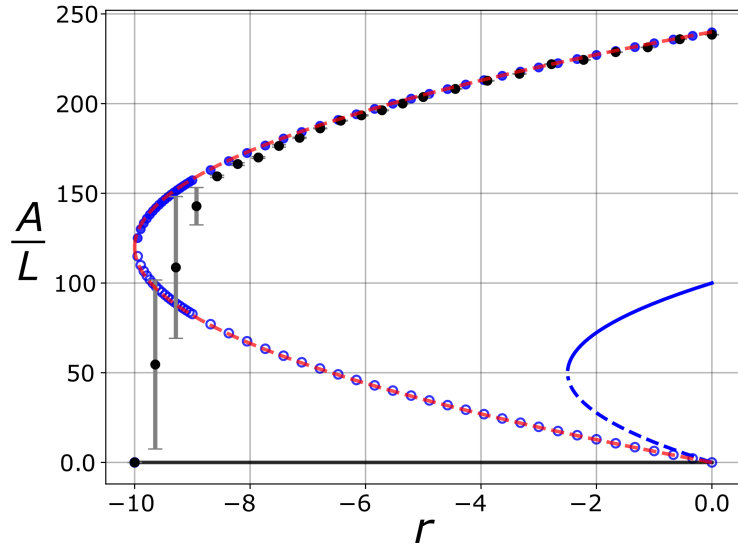

**Figure 5:** Effect of spatial self-organization on the demographic Allee effect. Population abundance as a function of the net population growth,  $r$ , obtained from: the deterministic density equation when patterns develop, Eq. (2.5) (blue points and blue lines); the non-spatial cubic model (blue lines); the meta-population approximation, Eq. (3.3) (dashed red line); and the stochastic dynamics (black circles with error bars indicating the variance of 50 independent realizations). The filled points and the blue solid line represent a stable equilibrium, whereas the empty symbols and blue dashed lines represent unstable equilibrium states. The deterministic simulations run until  $t = 1500$ , with  $dt = 0.05$  and  $dx = 0.008$ . The stochastic model runs until  $t = 500$  with  $\beta = 10^{-1}$ ,  $\gamma = 10^{-3}$ ,  $R_f = 0.5$ ,  $R_c = 1$  and  $\delta x = 0.02$ . All simulations are done with  $L = 32$  and  $D = 10^{-3}$ . See Supplementary Material section S6 for details on the numerical methods.

312 according to (see Supplementary Material section S4),

$$\frac{\partial \mathcal{N}(t)}{\partial t} = \left[ r + \beta(\eta + 1) \frac{\mathcal{N}(t)}{2R_f} - \gamma \frac{\mathcal{N}^2(t)}{4R_c^2} \right] \mathcal{N}(t), \quad (3.2)$$

313 which is a cubic equation for the dynamics of group size,  $\mathcal{N}$ . This equation encodes all the informa-  
 314 tion about the underlying network of inter-group interactions in the parameter  $\eta$ , which defines the  
 315 number of groups that interact with a focal group via facilitation, excluding the focal group itself.  
 316 Solving Eq. (3.2) we can obtain the possible stationary group sizes  $\mathcal{N}_0 = 0$  (extinction) and:

$$\mathcal{N}_{\pm} = \frac{(\eta + 1) \frac{\beta}{2R_f} \pm \sqrt{\left( (\eta + 1) \frac{\beta}{2R_f} \right)^2 + \frac{r\gamma}{R_c^2}}}{\gamma/2R_c^2}. \quad (3.3)$$

317 The predictions of this metapopulation-like approximation for  $r_c$  and the steady-state population  
 318 size are in excellent agreement with those of the density equation and the outcome of the stochastic

319 simulations (Fig. 5). In addition, mapping the spatially explicit dynamics to a set of coupled  
320 ordinary differential equations allows us to obtain analytical expressions for these two features of  
321 the demographic Allee effect in the presence of spatial patterns of population density. The steady-  
322 state population size is  $A = m\mathcal{N}_+$ , where  $\mathcal{N}_+$  is given by Eq. (3.3) and  $m$  is the number of groups  
323 that we can estimate from the pattern wavelength predicted by the wavenumber that maximizes  
324 the perturbation growth rate in Eq. (3.1),  $k_{max}$ . Imposing  $\mathcal{N}_+ = \mathcal{N}_-$  in Eq. (3.3), we can calculate  
325 the critical value of the net growth rate that can sustain a non-zero population size,

$$r_c = -\gamma^{-1} \left[ \frac{\beta R_c}{2 R_f} (\eta + 1) \right]^2. \quad (3.4)$$

326 As expected,  $r_c$  decreases with increasing facilitation and decreasing competition strength. In  
327 addition,  $r_c$  decreases when the number of groups that interact with one another increases. More  
328 specifically, for certain net growth rates  $r$ , a population would only be able to survive provided that  
329 groups facilitate each other (Fig. 6c), which makes long-range interactions a necessary conditions  
330 for population survival. Notice, however, that when the facilitation range increases and groups rely  
331 on one another for survival, the whole population becomes less resistant to local perturbations that  
332 might cause global extinctions due to the high connectivity between groups.

333 Organism grouping sets new ways in which the individual-level component Allee effect manifests  
334 at the population level and determines the Allee threshold. We analyze these possible outcomes  
335 for different numbers of groups and facilitation ranges using the metapopulation-like approximation  
336 in Eq. (3.2) that gives the dynamics of each group independently. Mimicking the one-dimensional  
337 landscape we used in all previous analyses, we consider that groups are arranged in a line. However,  
338 we do not consider periodic boundary conditions to prevent the number of groups from being  
339 effectively infinite. If the facilitation range is short so individuals in different groups do not interact  
340 with one another, the fitness of the individuals within each aggregate only depends on group size  
341 (Fig. 6a), and groups are independent units. In consequence, the formation or extinction of a group  
342 does not have any effect on the others, and the minimum population size that ensures population  
343 survival is equal to the Allee threshold of one single group,  $\mathcal{N}_-$  from Eq. (3.3) with  $\eta = 0$ . If the  
344 facilitation range is such that groups interact with one another, the fitness of the individuals can  
345 increase significantly due to the presence of neighbor groups. As a consequence, group size increases  
346 in the presence of more groups (Fig. 6b and 6c), and the Allee threshold is  $\mathcal{N}_-$  from Eq. (3.3)  
347 with  $\eta > 0$ . For very harsh environmental conditions (low  $r$ ) the population only survives if groups  
348 facilitate one another (Fig. 6c).

349 Finally, we computed the stationary-state population size as a function of the diffusion coefficient  
350 to evaluate the range of diffusion intensity at which the first two assumptions underlying the

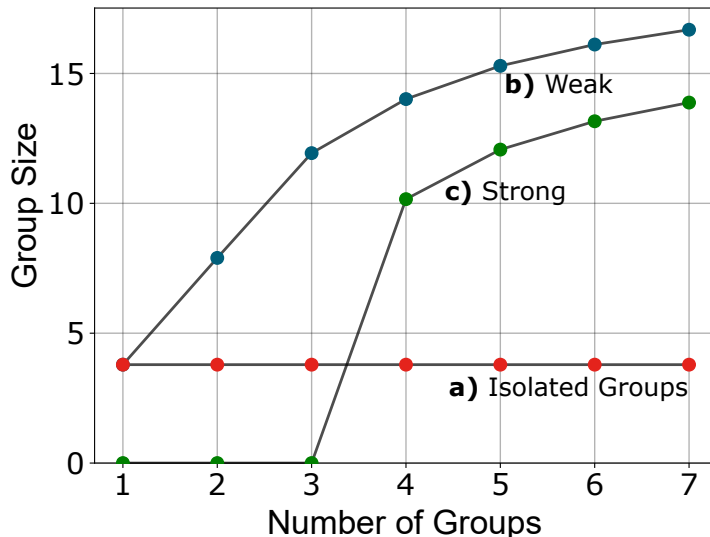

**Figure 6:** Demographic Allee effect in a population composed of groups. Here, we set the number of groups in the system and compute the size of a single group in the stationary state,  $\mathcal{N}_+$ . The red symbols correspond to a situation in which groups are isolated,  $\bar{r} = -2$  and  $R_f = 0.5$ ; blue and green symbols correspond to cases with inter-group facilitation with  $R_f = 2$  and  $r = -2$  (blue) and  $r = -100$  (green). For all cases,  $R_c = 1$

351 group-level approximation in Eq. (3.2) remain valid (Fig. 7a). Consistently with the simulations of  
 352 the stochastic individual-based dynamics (Fig. 2), we observe that the total population abundance  
 353 decreases as diffusion increases. In the low-diffusion regime, the population abundance agrees with  
 354 the predictions of the meta-population approximation. However, as diffusion increases, diffusion  
 355 takes control of the spatial dynamics, and the assumptions underlying the metapopulation approx-  
 356 imation stop being valid. As a result, the population density decreases until diffusion reaches a  
 357 critical value (black dashed line in Figure 7a), at which patterns do not form and the population  
 358 abundance is equal to that predicted by models assuming uniformly distributed individuals. We  
 359 also observe this decrease in population density in the spatial patterns of population density, which  
 360 tend to become uniform as diffusion increases (Fig. 7b).

## 361 4 Discussion

362 We theoretically investigated the demographic consequences of a component Allee effect across  
 363 various levels of spatial organization (Fig. 1). Our framework incorporates a component Allee effect  
 364 arising from reproductive facilitation, which makes the reproduction rates of a focal individual  
 365 increase with the population density within its neighborhood, and growth limitation caused by  
 366 intraspecific competition. Extending our analysis to other types of individual-level interactions

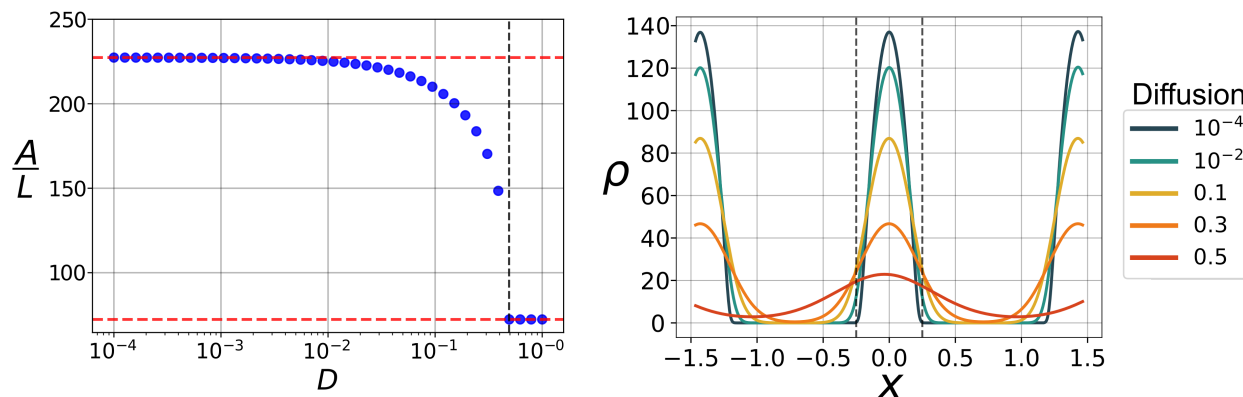

**Figure 7:** (a) Effect of increasing diffusion on the population abundance. Self-organized spatial patterns disappear when diffusion increases and the population abundance decreases from the metapopulation prediction  $\mathcal{N}_+$  to the uniform solution  $\rho_+$ . (b) Effect of diffusion on spatial patterns, stationary patterns of population density for different diffusion intensities (color code indicated in the legend). The black dashed lines limit the extent of the facilitation range,  $R_f$ . Parameter values (for both panels):  $t = 2 \times 10^4$ , with  $dt = 0.05$ ,  $dx = 0.008$ ,  $L = 32$  and parameters:  $r = -2$ ,  $R_f = 0.5$  and  $R_c = 1$ .

367 leading to component Allee effects, such as social behaviors, mate limitation, or environmental  
 368 conditioning (Courchamp et al., 2008; Oro, 2020b) is straightforward. We focused on quantifying  
 369 the impact of the spatial distribution of organisms on specific features of the demographic Allee  
 370 effect, such as the Allee threshold, the long-term total population size, and the lowest value of the  
 371 density-independent growth rate for which the population survives. We measured these quantities  
 372 in both uniformly and non-uniformly distributed populations.

373 Our approach, similarly to Surendran et al. (2020), differs from non-spatial and spatially implicit  
 374 metapopulation models by explicitly considering the range of interaction for both reproductive fa-  
 375 cilitation and crowding effects. This level of detail is partially captured by metapopulation models,  
 376 which assume that individuals only interact with others within the same population. Metapopula-  
 377 tion frameworks, however, assume a fixed population structure in groups, whereas groups emerges  
 378 naturally from individual-level processes in our model. This explicit description of the processes  
 379 the lead to grouping allows us to identify the individual-level processes that control for each of  
 380 the population-level features of the demographic Allee effect and subsequently manipulate them to  
 381 understand how different spatial structures impact the demographic Allee effect.

382 In addition, limiting the mechanisms responsible for the component Allee effect to a finite  
 383 neighborhood around each focal individual makes the population dynamics and the features of the  
 384 emergent demographic Allee effect depend on local, instead of total, population densities. For  
 385 example, the Allee threshold becomes a local feature of the population that depends on the density  
 386 of individuals within a given region of the landscape. This locality of the Allee threshold might



387 enable the survival of local populations in situations where the global density is very low, which is  
388 especially relevant when spatial fluctuations in population density are high, such as in the presence  
389 of clumps of organisms or groups. This strong dependence of the Allee threshold on the spatial  
390 population structure might help to explain field studies reporting population survival at low global  
391 population densities (Lundquist and Botsford, 2011; Rijnsdorp and Vingerhoed, 2001; Woodroffe,  
392 2011).

393 Our model also provides the appropriate theoretical framework to formalize the group Allee  
394 effect and integrate it within a unifying modeling approach (Angulo et al., 2018, 2013). When  
395 organisms aggregate, one can consider the groups as the fundamental units of the population. If  
396 competition acts on a longer range than facilitation, these groups are independent units that do not  
397 interact with one another. In consequence, the component Allee effect impacts the demographics of  
398 a single group, resulting in a demographic group Allee effect that only determines the population  
399 dynamics within that group. This same argument can be extended to cases in which facilitation  
400 acts on a longer range than competition. In this limit, groups interact with one another, which can  
401 result in a group-level Allee effect when the fitness of a group increases in the presence of neighbors.  
402 This group-level component Allee effect scales to the population level by creating an emergent  
403 demographic Allee effect acting on groups that can even result in the existence of a minimum  
404 number of groups to ensure population survival.

405 Beyond group-level processes, spatial heterogeneities in population density favor population sur-  
406 vival as long as the density within a region of the landscape is locally above the Allee threshold.  
407 Moreover, because groups in our model form in response to long-range competition, aggregation  
408 minimizes competition and results in larger global population sizes that are less prone to extinction  
409 due to demographic fluctuations (Dennis, 2002). Aggregation also lowers the Allee threshold signif-  
410 icantly, which favors the persistence of local populations at lower population densities. This local  
411 decrease in the Allee threshold is different from the effective decrease in the global Allee threshold  
412 discussed above, which is related to the locality of the Allee threshold rather than to its value.  
413 Finally, as found in previous studies, our model predicts that aggregated populations can survive in  
414 harsher environments than uniformly distributed populations. That is, uniformly distributed pop-  
415 ulations exhibit a higher value of  $r_c$  than populations that develop self-organized spatial patterns  
416 (Surendran et al., 2020).

417 Our model provides the simplest framework to study Allee effects across levels of spatial orga-  
418 nization and a unifying theoretical approach to understand how Allee effects operate for different  
419 population structures. To keep it as simple as possible, we made some simplifying model assump-  
420 tions. The choice of the component Allee effect, as we discussed before, can be easily changed  
421 by modifying the set of individual-level demographic reactions. Other assumptions, such as the

422 choice of the interaction kernels, would not change our results provided that they lead to spatial  
423 pattern formation (Colombo et al., 2023; Martínez-García et al., 2013; Pigolotti et al., 2007). One  
424 could also consider a different mechanism responsible for spatial pattern formation, and our results  
425 would hold provided that spatial patterns emerge in the form of clumps of population density. We  
426 considered non-local interactions as the pattern-forming mechanism because it is the most straight-  
427 forward way to create aggregation patterns (Martínez-García et al., 2014). An interesting direction  
428 for future research, however, would be to consider alternative pattern-forming interactions, such as  
429 density-dependent movement or resource-consumer interactions, leading to a larger variety of spa-  
430 tial patterns in population density, such as labyrinths and gaps (Liu et al., 2013; Martinez-Garcia  
431 et al., 2015, 2022; Rao and Kang, 2016; Rietkerk and Van de Koppel, 2008). Finally, our model-  
432 ing framework is also easily extendable to include interactions between several species (Maciel and  
433 Martinez-Garcia, 2021; Simoy and Kuperman, 2023), thus providing a theoretical tool to investigate  
434 community-level consequences of different component Allee effects.

## 435 5 Conclusions

436 We investigated the demographic consequences of an individual-level component Allee effect in a  
437 spatially extended population (Fig. 1). We departed from a mechanistic description of how the vital  
438 rates of a focal individual depend on the density of conspecifics around it. Our model, therefore,  
439 accounts for spatial processes both through the spatial population structure and the range of the  
440 different interactions among them. We considered the most straightforward set of processes leading  
441 to a demographic Allee effect, which in the non-spatial limit collapses to a cubic model (Kot, 2001;  
442 Méndez et al., 2019). Starting from this description of the individual vital rates, we present a  
443 series of mathematical techniques to investigate the population-level how a component Allee effect  
444 manifests across various characteristic spatial scales of the population.

445 For the specific component Allee effect we studied here, we show that aggregation changes  
446 three main population-level features characteristics of Allee effects. First, aggregation enhances  
447 population density locally and thus allows the population to persist in harsh environments where  
448 uniformly distributed individuals would go extinct. Second, aggregation results in localized sub-  
449 populations that follow independent dynamics from one another and might eliminate the population-  
450 level Allee effect. Finally, aggregation decreases competition by limiting its effect to individuals  
451 within the same group. Consequently, aggregation reduces the Allee threshold and increases the  
452 total population size. More generally, our work emphasizes the potential that models developed  
453 from a rigorous description of the individual-level interactions and processes have to improve our  
454 understanding of observed patterns and trends in population dynamics.

## 455 Acknowledgments

456 This work was partially funded by the Center of Advanced Systems Understanding (CASUS), which  
457 is financed by Germany's Federal Ministry of Education and Research (BMBF) and by the Saxon  
458 Ministry for Science, Culture and Tourism (SMWK) with tax funds on the basis of the budget ap-  
459 proved by the Saxon State Parliament. This work was also funded by FAPESP through a Master Fel-  
460 lowship no. 2020/15643-8 (D.C.P.J), a BIOTA Young Investigator Research Grant no. 2019/05523-8  
461 (D.C.P.J. and R.M.-G.), and ICTP-SAIFR grant no. 2016/01343-7; the Abdus Salam ICTP through  
462 the Associate's Programme, and the Simons Foundation through grant no. 284558FY19.

## 463 References

- 464 Allee, W. and Bowen, E. S. (1932). Studies in animal aggregations: mass protection against colloidal  
465 silver among goldfishes. *Journal of Experimental Zoology*, 61(2):185–207.
- 466 Allee, W. and Rosenthal, G. (1949). Group survival value for philodina rosola, a rotifer. *Ecology*,  
467 30(3):395–397.
- 468 Allee, W. C. (1938). *Social life of animals*. Number Edn 1. William Heineman Ltd, London and  
469 Toronto.
- 470 Allee, W. C., Park, O., Emerson, A. E., Park, T., Schmidt, K. P., et al. (1949). *Principles of Animal*  
471 *Ecology*. Number Edn 1. WB Saundere Co. Ltd.
- 472 Angulo, E., Luque, G. M., Gregory, S. D., Wenzel, J. W., Bessa-Gomes, C., Berec, L., and Cour-  
473 champ, F. (2018). Allee effects in social species. *Journal of Animal Ecology*, 87(1):47–58.
- 474 Angulo, E., Rasmussen, G. S., Macdonald, D. W., and Courchamp, F. (2013). Do social groups  
475 prevent Allee effect related extinctions?: The case of wild dogs. *Frontiers in zoology*, 10(1):1–14.
- 476 Ashman, T.-L., Knight, T. M., Steets, J. A., Amarasekare, P., Burd, M., Campbell, D. R., Dudash,  
477 M. R., Johnston, M. O., Mazer, S. J., Mitchell, R. J., et al. (2004). Pollen limitation of plant  
478 reproduction: ecological and evolutionary causes and consequences. *Ecology*, 85(9):2408–2421.
- 479 Asmussen, M. A. (1979). Density-dependent selection ii. the Allee effect. *The American Naturalist*,  
480 114(6):796–809.
- 481 Colombo, E. H., López, C., and Hernández-García, E. (2023). Pulsed interaction signals as a route  
482 to biological pattern formation. *Physical Review Letters*, 130(5):058401.

- 483 Courchamp, F., Berec, L., and Gascoigne, J. (2008). *Allee effects in ecology and conservation*. OUP  
484 Oxford.
- 485 Crews, D., Grassman, M., and Lindzey, J. (1986). Behavioral facilitation of reproduction in sexual  
486 and unisexual whiptail lizards. *Proceedings of the National Academy of Sciences of the United*  
487 *States of America*, 83(24):9547–9550.
- 488 Cross, M. C. and Hohenberg, P. (1993). Pattern formation outside of equilibrium. *Reviews of*  
489 *Modern Physics*, 65(3).
- 490 Cushing, J. (1988). The Allee effect in age-structured population dynamics. In Hallam, T. G., Gross,  
491 L., and Levin, S., editors, *Mathematical Ecology-Proceedings Of The Autumn Course Research*  
492 *Seminars International Ctr For Theoretical Physics*, pages 479–505. World Scientific Publ.
- 493 Dechmann, D. K., Kranstauber, B., Gibbs, D., and Wikelski, M. (2010). Group hunting—a reason  
494 for sociality in molossid bats? *PLoS one*, 5(2):e9012.
- 495 Dennis, B. (1981). Extinction and waiting times in birth-death processes: applications to endangered  
496 species and insect pest control. *Statistical distributions in scientific work*, 6:289–301.
- 497 Dennis, B. (1989). Allee effects: population growth, critical density, and the chance of extinction.  
498 *Natural Resource Modeling*, 3(4):481–538.
- 499 Dennis, B. (2002). Allee effects in stochastic populations. *Oikos*, 96(3):389–401.
- 500 Doi, M. (1976). Stochastic theory of diffusion-controlled reaction. *Journal of Physics A: Mathemat-*  
501 *ical and General*, 9(9):1479.
- 502 Drake, J. and Kramer, A. (2011). Allee effects. *Nature Education Knowledge*, 3(10):2.
- 503 Garrett, K. and Bowden, R. (2002). An Allee effect reduces the invasive potential of *tilletia indica*.  
504 *Phytopathology*, 92(11):1152–1159.
- 505 Ghazoul, J. (2005). Buzziness as usual? Questioning the global pollination crisis. *Trends in ecology*  
506 *& evolution*, 20(7):367–373.
- 507 Gillespie, D. T. (1977). Exact stochastic simulation of coupled chemical reactions. *The journal of*  
508 *physical chemistry*, 93555(1):2340–2361.
- 509 Guy, C., Smyth, D., and Roberts, D. (2019). The importance of population density and inter-  
510 individual distance in conserving the european oyster *ostrea edulis*. *Journal of the Marine Bio-*  
511 *logical Association of the United Kingdom*, 99(3):587–593.

- 512 Hernández-García, E. and López, C. (2004). Clustering, advection, and patterns in a model of  
513 population dynamics with neighborhood-dependent rates. *Physical Review E*, 70(1):016216.
- 514 Hsu, P.-H. and Fredrickson, A. (1975). Population-changing processes and the dynamics of sexual  
515 populations. *Mathematical Biosciences*, 26(1-2):55–78.
- 516 Kanarek, A. R., Webb, C. T., Barfield, M., and Holt, R. D. (2013). Allee effects, aggregation, and  
517 invasion success. *Theoretical ecology*, 6(2):153–164.
- 518 Keitt, T. H., Lewis, M. A., and Holt, R. D. (2001). Allee effects, invasion pinning, and species’  
519 borders. *The American Naturalist*, 157(2):203–216.
- 520 Kostitzin, V. (1940). Sur la loi logistique et ses généralisations. *Acta Biotheoretica*, 5(3):155–159.
- 521 Kot, M. (2001). Harvest models: bifurcations and breakpoints. In *Elements of Mathematical Ecology*,  
522 pages 13–25. Cambridge University Press.
- 523 Kramer, A. M., Dennis, B., Liebhold, A. M., and Drake, J. M. (2009). The evidence for Allee effects.  
524 *Population Ecology*, 51(3):341–354.
- 525 Lande, R. (1987). Extinction thresholds in demographic models of territorial populations. *The*  
526 *American Naturalist*, 130(4):624–635.
- 527 Le Cadre, S., Tully, T., Mazer, S. J., Ferdy, J.-B., Moret, J., and Machon, N. (2008). Allee  
528 effects within small populations of *Aconitum napellus ssp. lusitanicum*, a protected subspecies in  
529 Northern France. *New Phytologist*, 179(4):1171–1182.
- 530 Lerch, B. A., Nolting, B. C., and Abbott, K. C. (2018). Why are demographic Allee effects so rarely  
531 seen in social animals? *Journal of Animal Ecology*, 87(6):1547–1559.
- 532 Levitan, D. R. (2005). The Allee effect in the sea. *Marine Conservation Biology: the science of*  
533 *maintaining the sea’s biodiversity*, pages 47–57.
- 534 Liermann, M. and Hilborn, R. (2001). Depensation: evidence, models and implications. *Fish and*  
535 *Fisheries*, 2(1):33–58.
- 536 Liu, Q.-X., Doelman, A., Rottschäfer, V., de Jager, M., Herman, P. M., Rietkerk, M., and van de  
537 Koppel, J. (2013). Phase separation explains a new class of self-organized spatial patterns in  
538 ecological systems. *Proceedings of the National Academy of Sciences*, 110(29):11905–11910.
- 539 Lundquist, C. J. and Botsford, L. W. (2011). Estimating larval production of a broadcast spawner:  
540 the influence of density, aggregation, and the fertilization Allee effect. *Canadian Journal of*  
541 *Fisheries and Aquatic Sciences*, 68(1):30–42.

- 542 Luque, G. M., Giraud, T., and Courchamp, F. (2013). Allee effects in ants. *Journal of Animal*  
543 *Ecology*, 82(5):956–965.
- 544 Luzuriaga, A. L., Escudero, A., Albert, M. J., and Giménez-Benavides, L. (2006). Population  
545 structure effect on reproduction of a rare plant: beyond population size effect. *Botany*, 84(9):1371–  
546 1379.
- 547 Maciel, G. A. and Lutscher, F. (2015). Allee effects and population spread in patchy landscapes.  
548 *Journal of Biological Dynamics*, 9(1):109–123.
- 549 Maciel, G. A. and Martinez-Garcia, R. (2021). Enhanced species coexistence in Lotka-Volterra  
550 competition models due to nonlocal interactions. *Journal of Theoretical Biology*, 530:110872.
- 551 Martinez-Garcia, R., Cabal, C., Calabrese, J. M., Hernández-García, E., Tarnita, C. E., López,  
552 C., and Bonachela, J. A. (2023). Integrating theory and experiments to link local mechanisms  
553 and ecosystem-level consequences of vegetation patterns in drylands. *Chaos, Solitons & Fractals*,  
554 166:112881.
- 555 Martínez-García, R., Calabrese, J. M., Hernández-García, E., and López, C. (2013). Vegetation  
556 pattern formation in semiarid systems without facilitative mechanisms. *Geophysical Research*  
557 *Letters*, 40(23):6143–6147.
- 558 Martínez-García, R., Calabrese, J. M., Hernández-García, E., and López, C. (2014). Minimal  
559 mechanisms for vegetation patterns in semiarid regions. *Philosophical Transactions of the Royal*  
560 *Society A: Mathematical, Physical and Engineering Sciences*, 372(2027):20140068.
- 561 Martinez-Garcia, R., Murgui, C., Hernández-García, E., and López, C. (2015). Pattern Formation  
562 in Populations with Density-Dependent Movement and Two Interaction Scales. *PLoS ONE*,  
563 10:e0132261.
- 564 Martinez-Garcia, R., Tarnita, C. E., and Bonachela, J. A. (2022). Self-organized patterns in ecolog-  
565 ical systems: from microbial colonies to landscapes. *Emerging Topics in Life Sciences*, 6(3):245–  
566 258.
- 567 Méndez, V., Assaf, M., Masó-Puigdellosas, A., Campos, D., and Horsthemke, W. (2019). De-  
568 mographic stochasticity and extinction in populations with Allee effect. *Physical Review E*,  
569 99(2):022101.
- 570 Nowak, K. and Lee, P. C. (2011). Demographic structure of zanzibar red colobus populations in  
571 unprotected coral rag and mangrove forests. *International Journal of Primatology*, 32(1):24–45.

- 572 Oro, D. (2020a). Extinction, nonlinear dynamics, and sociality. In Oro (2020b), pages 114–127.
- 573 Oro, D. (2020b). *Perturbation, behavioural feedbacks, and population dynamics in social animals:*  
574 *when to leave and where to go*. Oxford University Press, USA.
- 575 Orr, H. A. (2009). Fitness and its role in evolutionary genetics. *Nature Reviews Genetics*, 10(8):531–  
576 539.
- 577 Padrón, V. and Trevisan, M. C. (2000). Effect of aggregating behavior on population recovery on  
578 a set of habitat islands. *Mathematical biosciences*, 165(1):63–78.
- 579 Peliti, L. (1985). Path integral approach to birth-death processes on a lattice. *Journal de Physique*,  
580 46(9):1469–1483.
- 581 Pigolotti, S., López, C., and Hernández-García, E. (2007). Species clustering in competitive lotka-  
582 volterra models. *Physical review letters*, 98(25):258101.
- 583 Rao, F. and Kang, Y. (2016). The complex dynamics of a diffusive prey–predator model with an  
584 Allee effect in prey. *Ecological complexity*, 28:123–144.
- 585 Rietkerk, M. and Van de Koppel, J. (2008). Regular pattern formation in real ecosystems. *Trends*  
586 *in ecology & evolution*, 23(3):169–175.
- 587 Rijnsdorp, A. and Vingerhoed, B. v. (2001). Feeding of plaice pleuronectes platessa l. and sole solea  
588 solea (l.) in relation to the effects of bottom trawling. *Journal of Sea Research*, 45(3-4):219–229.
- 589 Silliman, B. R., Schrack, E., He, Q., Cope, R., Santoni, A., van der Heide, T., Jacobi, R., Jacobi, M.,  
590 and van de Koppel, J. (2015). Facilitation shifts paradigms and can amplify coastal restoration  
591 efforts. *Proceedings of the National Academy of Sciences*, 112(46):14295–14300.
- 592 Simoy, M. I. and Kuperman, M. N. (2023). Non-local interaction effects in models of interacting  
593 populations. *Chaos, Solitons & Fractals*, 167:112993.
- 594 Snaith, T. V. and Chapman, C. A. (2008). Red colobus monkeys display alternative behavioral  
595 responses to the costs of scramble competition. *Behavioral Ecology*, 19(6):1289–1296.
- 596 Stephens, P. A., Frey-roos, F., Arnold, W., and Sutherland, W. J. (2002). Model complexity and  
597 population predictions. the alpine marmot as a case study. *Journal of Animal Ecology*, 71(2):343–  
598 361.
- 599 Stephens, P. A., Sutherland, W. J., and Freckleton, R. P. (1999). What is the Allee effect? *Oikos*,  
600 pages 185–190.

- 601 Sun, G.-Q. (2016). Mathematical modeling of population dynamics with Allee effect. *Nonlinear*  
602 *Dynamics*, 85(1):1–12.
- 603 Surendran, A., Plank, M. J., and Simpson, M. J. (2020). Population dynamics with spatial structure  
604 and an Allee effect. *Proceedings of the Royal Society A: Mathematical, Physical and Engineering*  
605 *Sciences*, 476:1–19.
- 606 Tammes, P., Klomp, H., and Van Montfort, M. (1964). Sexual reproduction and underpopulation.  
607 *Archives Néerlandaises de Zoologie*, 16(1):105–110.
- 608 Täuber, U. C. (2007). *Field-Theory Approaches to Nonequilibrium Dynamics*, pages 295–348.  
609 Springer Berlin Heidelberg, Berlin, Heidelberg.
- 610 Tcheslavskaja, K., Brewster, C. C., and Sharov, A. A. (2002). Mating success of gypsy moth (lepi-  
611 doptera: Lymantriidae) females in southern wisconsin. *The Great Lakes Entomologist*, 35(1):1.
- 612 Thomas, J. D. and Benjamin, M. (1974). The Effects of Population Density on Growth and Re-  
613 production of *Biomphalaria glabrata* (Say) (Gasteropoda: Pulmonata). *The Journal of Animal*  
614 *Ecology*, 43(1):31.
- 615 Volterra, V. (1938). Population growth, equilibria, and extinction under specified breeding condi-  
616 tions: a development and extension of the theory of the logistic curve. *Human Biology*, 10(1):1–11.
- 617 Wagenius, S. (2006). Scale dependence of reproductive failure in fragmented echinacea populations.  
618 *Ecology*, 87(4):931–941.
- 619 Wang, Y., Shi, J., and Wang, J. (2019). Persistence and extinction of population in reaction–  
620 diffusion–advection model with strong Allee effect growth. *Journal of mathematical biology*,  
621 78(7):2093–2140.
- 622 Woodroffe, R. (2011). Demography of a recovering african wild dog (*lycaon pictus*) population.  
623 *Journal of Mammalogy*, 92(2):305–315.
- 624 Woodroffe, R., O’Neill, H. M., and Rabaiotti, D. (2020). Within-and between-group dynamics in  
625 an obligate cooperative breeder. *Journal of Animal Ecology*, 89(2):530–540.
